# Supplementary material for: On-column derivatization of oligodeoxynucleotides with ferrocene
Source: Royal Society of Chemistry journal article supplement (doi:10.1039/a907568b), 2000-01-01
Supplement: a907568b1.doc [file a907568b1.doc]

**Experimental Procedures**

All solvents were dried and distilled prior to use. Absorption spectra were measured on a Hewlett-Packard 8453 diode array spectrometer. Emission spectra were recorded on a Perkin-Elmer LS50B. CD spectra were collected on a JASCO J-710 spectropolarimeter. Reversed-phase HPLC was performed on a Rainin HPLC with a C18 column monitoring at 254. Electrochemical measurements were performed using a EG&G Princeton Applied Research electrochemical apparatus. Melting profiles were acquired on a Hewlett-Packard 8453 diode array spectrometer equipped with a Peltier heating device. DNA synthesis was performed on an ABI 395 DNA synthesizer. Reagents for DNA synthesis were purchased from Glen Research.

**Syntheses. Ferrocenoyl propargylamide (FPA).** Ferrocene carboxylic acid (0.230 g, 1 mmol), propargylamine hydrochloride (0.092 g, 1 mmol), and 1-hydroxybenzotriazole (0.153 g, 1 mmol) were dissolved in dimethylformamide (DMF)/CHCl3 (50/50, dry). The mixture was stirred at 0C and triethylamine (0.2 mL, 1.2 mmol) was added to the mixture. Dicyclohexylcarbodiimide (0.248 g, 1.2 mmol) in DMF was then added dropwise to the mixture. The mixture was stirred and allowed to reach room temperature overnight. Solvent was removed *in vacuo* and the brown solid was dissolved in ethyl acetate. The urea was filtered off and the filtrate was washed with 5% NaHCO3, 0.5 N HCl, and water and subsequently dried over sodium sulfate. The solvent was removed *in vacuo*. The crude product was purified on a silica gel column in chloroform. Removal of solvent *in vacuo* afforded 0.250 g of a yellow/orange powder (yield 93.6 %). HR FAB-MS exact mass, calculated for C14H13ONFe, 267.0347; found, 267.0341. 1H NMR ( in ppm, CDCl3): 3.1 (1H, s, C*H*); 3.9 (2H, d, C*H*2); 4.2 (5H, s, unsubstituted Cp ring); 4.35 (2H, t, *m-H* on Cp ring); 4.8 (2H, t, *o-H* on Cp ring); 8.1 (1H, t, N*H*).

**3',5'-Dibenzoyl-5-(ferrocenoyl propargylamide) uridine (FPAU).** FPA (0.801g, 3 mmol), 3',5'-dibenzoyl-2'-deoxyuridine (0.562g, 1 mmol), Pd(PPh3)4 (0.1154g, 0.1 mmol), and CuI (0.038g, 0.2 mmol) were dissolved in DMF (dry) and 0.7 mL TEA (5 mmol) was added to the flask. The reac­tion was carried out under N2 for 6 h at room temperature. Solvent was removed *in vacuo* and the brown oil redissolved in chloroform. The product was washed with 10% EDTA solution, water and was subsequently dried over Na2SO4. The product was further purified on a silica gel column in chloroform, yielding 0.59 g yellow powder (84% yield. HR FAB-MS exact mass calculated for C37H31N3O8Fe, 701.1461; found, 701.1461. 1H NMR ( in ppm, dmso): 4.18 (5H, s), 4.3 (2H, t), and 4.8 (2H, t), Cp protons; 6.2 (1H, t, *H*1'); 8.2 (1H, s, *H*2 on uridine); 7.5-8.2 (10H, m, C6*H*5CO).
